# Supplementary material for: Prognostic performance of the FACED score and bronchiectasis severity index in bronchiectasis: a systematic review and meta-analysis
Source: PubMed Central journal article supplement (PMC7601347; doi:10.1042/bsr20194514), 2020-10-30
Supplement: BSR-2019-4514_supp.pdf [file BSR-2019-4514_supp.pdf]

**Supplementary Table 1. The subgroup analysis for pooled estimates of FACED score and BSI for predicting mortality at each cut-off value**

| Outcomes / Scales          | Study / Participants | Sensitivity (95% CI) | Specificity (95% CI) | PLR (95% CI)       | NLR (95% CI)        | DOR (95% CI)         | I <sup>2</sup> |
|----------------------------|----------------------|----------------------|----------------------|--------------------|---------------------|----------------------|----------------|
| <b>All-cause Mortality</b> |                      |                      |                      |                    |                     |                      |                |
| FACED                      |                      |                      |                      |                    |                     |                      |                |
| ≥ 3                        | 13 /3848             | 0.76 (0.69 - 0.82)   | 0.68 (0.63 - 0.73)   | 2.40 (2.09 - 2.75) | 0.35 (0.28 - 0.45)  | 6.53 (5.03 - 9.27)   | 96.12          |
| Design - Retrospective     | 5/2140               | 0.79 (0.68 - 0.86)   | 0.71 ( 0.64 - 0.76)  | 2.68 (2.34 - 3.08) | 0.31 (0.21 - 0.44)  | 8.81 (6.11 - 12.71)  | 90.95          |
| Design - Prospective       | 8/1708               | 0.72 (0.62 - 0.79)   | 0.66 (0.58 - 0.73)   | 2.09 (1.76 - 2.48) | 0.43 (0.34 - 0.55 ) | 4.83 ( 3.48 - 6.69)  | 93.57          |
| Age - ≤ 65-year-old        | 9/2818               | 0.76 (0.65 - 0.84)   | 0.72 (0.67 - 0.77)   | 2.70 (2.42 - 3.01) | 0.34 (0.24 - 0.47)  | 8.00 (5.71 - 11.20)  | 96.39          |
| Age - ≥ 65-year-old        | 4/1030               | 0.75 (0.67 - 0.82)   | 0.59 (0.52 - 0.65)   | 1.82 (1.51 - 2.18) | 0.42 (0.31 - 0.58)  | 4.28 (2.68 - 6.86)   | 0              |
| BSI                        |                      |                      |                      |                    |                     |                      |                |
| ≥ 5                        | 11/2986              | 0.95 (0.91 - 0.98)   | 0.27 (0.20 - 0.35)   | 1.30 (1.18 - 1.42) | 0.19 (0.10 - 0.34)  | 7.01 (3.67 - 13.36)  | 91.67          |
| Design - Retrospective     | 2/670                | NA                   | NA                   | NA                 | NA                  | NA                   |                |
| Design - Prospective       | 9/2316               | 0.96 (0.91- 0.98)    | 0.30 (0.25 - 0.36)   | 1.37 (1.28 - 1.47) | 0.14 (0.06 - 0.29)  | 10.15 (4.61 - 22.35) | 84.54          |

**Notes: Abbreviations:** PLR, Positive Likelihood Ratio; NLR, Negative Likelihood Ratio; DOR, Diagnostic Odds Ratio; NA, Not Available.

## **e-Appendix 1**

### **Methods**

#### **Search strategy**

Database: PubMed

1. "bronchiectasis"[MeSH Terms] OR "bronchiectasis" [tiab] OR "non-CF bronchiectasis" [tiab] OR "NCFB" [tiab] OR "bronchiect\*"
2. "Bronchiectasis screen\*" OR "Bronchiectasis score\*" OR "Bronchiectasis scale\*" OR "Bronchiectasis assessment\*" OR "Bronchiectasis index\*" OR "FACED" OR "Bronchiectasis Severity Index" OR "BSI"
3. 1 AND 2

Database: EMBASE

1. exp Bronchiectasis/
2. bronchiect\$.mp.
3. bronchoect\$.mp.
4. kartagener\$.mp.
5. (bronchial\$ adj3 dilat\$).mp.
6. or/1-5
7. (assessment test or Bronchiectasis screen\* or Bronchiectasis score\* or Bronchiectasis scale\* or Bronchiectasis assessment\* or Bronchiectasis index or FACED or Bronchiectasis Severity Index or BSI).mp.
8. 6 AND 7

Cochrane Database of Systematic Reviews

1. bronchiectasis OR non-CF bronchiectasis OR NCFB OR bronchiect\*

2. assessment test or Bronchiectasis screen\* or Bronchiectasis score\* or  
Bronchiectasis scale\* or Bronchiectasis assessment\* or Bronchiectasis index or  
FACED or Bronchiectasis Severity Index or BSI

3. 1 AND 2
